# Supplementary material
Source: PubMed Central journal article supplement (PMC8219944)
Supplement: mmc1.pdf [file mmc1.pdf]

## Appendix A: Timeline of main events and containment measures for the outbreak of the pandemic in Israel

| Date      | Event/ Measure                                                                                                                                                                                                                                                                                       |
|-----------|------------------------------------------------------------------------------------------------------------------------------------------------------------------------------------------------------------------------------------------------------------------------------------------------------|
| January   |                                                                                                                                                                                                                                                                                                      |
| 1.23      | Preliminary instructions regarding COVID-19 infections – symptoms, isolation (home confinement), treatment.                                                                                                                                                                                          |
| 1.30      | Restrictions on incoming flights from China                                                                                                                                                                                                                                                          |
| February  |                                                                                                                                                                                                                                                                                                      |
| 2.19      | Restrictions on incoming flights from other countries (Hong-Kong, Thailand, Macau, Singapore)                                                                                                                                                                                                        |
| 2.27      | First verified case of COVID-19 in Israel                                                                                                                                                                                                                                                            |
| March     |                                                                                                                                                                                                                                                                                                      |
| 3.2       | General Elections in Israel                                                                                                                                                                                                                                                                          |
| 3.4       | Home confinement for all incoming passengers from France, Austria, Germany, Switzerland, and Spain – and restrictions on incoming flights from these countries. Limitations on passengers returning from abroad. Restrictions on events of more than 5,000 people                                    |
| 3.9       | Home confinement for all returning passengers.                                                                                                                                                                                                                                                       |
| 3.10      | Restrictions on events of more than 2,000 people.                                                                                                                                                                                                                                                    |
| 3.11      | Restrictions on events of more than 100 participants. General recommendations to limit social gatherings, remote work, and employing hygiene means.                                                                                                                                                  |
| 3.10-11   | Purim – Jewish religious holiday usually celebrated with large crowd gatherings in synagogues and street festivals.                                                                                                                                                                                  |
| 3.12      | Shutdown of public and private education                                                                                                                                                                                                                                                             |
| 3.14      | Restrictions on the usage of Mikveh for males.                                                                                                                                                                                                                                                       |
| 3.16      | Lockdowns in hotspots of infections.                                                                                                                                                                                                                                                                 |
| 3.17      | Arab religious personnel voluntarily close all places of worship.                                                                                                                                                                                                                                    |
| 3.19      | General restrictions on movement (permitting only work, food supply, medication and medical aid, religious ceremonies, and sports)                                                                                                                                                                   |
| 3.25      | General restrictions on movement – limited to a radius of 100 meter from households.                                                                                                                                                                                                                 |
| 3.31      | Restrictions on places of religious worship for Jews. Recommendation to use personal masks.                                                                                                                                                                                                          |
| April     |                                                                                                                                                                                                                                                                                                      |
| 4.8       | Passover – Jewish religious holiday usually celebrated in large family gatherings. Due to the high-risk of infections (especially for elderly vulnerable populations) a county-wide curfew was set restricting movement in cities to a 100-meter radius, and highly limited mobility between cities. |
| 4.12      | Personal masks compulsory.                                                                                                                                                                                                                                                                           |
| 4.19      | Relief measures – allowing limited commerce (tav sagol), limited participation in worship for Jews, individual physical activity in a radius of 500 meters from the household.                                                                                                                       |
| 4.26      | Relief measures – allowing less limited commerce,                                                                                                                                                                                                                                                    |
| 4.30      | Relief measures – no limitations on individual physical activity,                                                                                                                                                                                                                                    |
| May       |                                                                                                                                                                                                                                                                                                      |
| Early May | Further relief measures – including public and private education, relief on 100-meter limitations, limited public transportation                                                                                                                                                                     |
| 5.10      | Public events limited to 50 people                                                                                                                                                                                                                                                                   |

## Appendix B: Regression models of COVID-19 infection rates and other types of densities

The analyses in the body of the paper are based on *Dwelling Density* which is the most restrictive density measure. As specified in our Data and Methods section, we have also generated and tested 3 other population density measures: *Municipal Density* (Table 2B), *Density for a lax lockdown* (Table 3B), and *Density for stringent lockdown* (Table 4B). Analyses suggest similar conclusions to those elaborated above. In each of these tables, we use multivariate models:

- Model 1 specifies new cases per 100,000 in the last 14 days as the outcome variable for all cases.
- Model 2 specifies new cases per 100,000 in the last 14 days as the outcome variable only for cities with population over 20,000.
- Model 3 specifies new cases per 100,000 in the last 14 days as the outcome variable and compliance at t-21 for all cases.
- Model 4 specifies new cases per 100,000 in the last 14 days as the outcome variable and compliance at t-21 only for cities with population over 20,000.

Lastly, we have also tested correlations between *household density* and rates of COVID-19 infections (Table 5B) following the same models; we did not find any statistically significant effect.<sup>1</sup> Table 1B shows the Pearson correlation between these different density measures.

---

<sup>1</sup> Data on average people per household at the municipal level is based on the Israeli Central Bureau of Statistics most updated local authority report. See n. 6 above. We supplemented lacking data from the Israeli Central Bureau of Statistics 2008 census. <https://www.cbs.gov.il/en/subjects/Pages/The-2008-Census-of-Population.aspx>

Table 1B Correlations between density variables

|                                            | Density #1<br>(municipal) | Density #2<br>(lax<br>lockdown) | Density #3<br>(stringent<br>lockdown) | Density #4<br>(dwelling) | Density #5<br>(people per<br>household) |
|--------------------------------------------|---------------------------|---------------------------------|---------------------------------------|--------------------------|-----------------------------------------|
| Density #1<br>(municipal)                  | 1.00                      |                                 |                                       |                          |                                         |
| Density #2<br>(lax lockdown)               | 0.77                      | 1.00                            |                                       |                          |                                         |
| Density #3<br>(stringent<br>lockdown)      | 0.77                      | 0.99                            | 1.00                                  |                          |                                         |
| Density #4<br>(dwelling)                   | 0.77                      | 0.99                            | 0.99                                  | 1.00                     |                                         |
| Density #5<br>(people<br>per<br>household) | -0.03                     | 0.05                            | 0.08                                  | 0.07                     | 1.00                                    |

Table 2B:  
Municipality Density

| Variables                  | Model 2B.1           | Model 2B.2           | Model 2B.3            | Model 2B.4            |
|----------------------------|----------------------|----------------------|-----------------------|-----------------------|
| Compliance at t-21         | -                    | -                    | -144.94 **<br>(48.35) | -153.75 **<br>(49.04) |
| Municipal Density          | .0005<br>(.0006)     | .0008<br>(.0006)     | .0007<br>(.0009)      | .0006<br>(.0009)      |
| Arab                       | -14.08 **<br>(5.00)  | -21.42 **<br>(6.85)  | -25.16<br>(9.82)      | -28.09<br>(9.98)      |
| Mixed                      | -1.58<br>(8.79)      | -1.85<br>(6.99)      | -6.33<br>(9.43)       | -8.26<br>(9.53)       |
| Bedouin                    | -3.09<br>(11.08)     | 8.84<br>(12.59)      | -28.76<br>(26.61)     | -32.93<br>(26.83)     |
| Ultra-Orthodox             | 16.71<br>(14.79)     | -8.53<br>(18.15)     | 3.25<br>(24.87)       | -.06<br>(25.05)       |
| Ultra-Orthodox<br>*Density | .005 ***<br>(.001)   | 0.006 ***<br>(0.001) | .009 ***<br>(.001)    | .01 ***<br>(.001)     |
| Socioeconomic<br>scale     | -4.85<br>(2.53)      | -7.46<br>(3.35)      | 5.94<br>(7.1)         | 5.71<br>(17.08)       |
| Constant                   | 18.29 ***<br>(3.84)  | 17.58 ***<br>(4.16)  | 187.54<br>(51.12)     | 199.1<br>(51.92)      |
|                            | N = 1,351            | N = 623              | N = 304               | N = 296               |
|                            | F (10, 1340) = 20.50 | F (10, 612) = 29.26  | F (11, 292) = 32.60   | F (11, 284) = 32.39   |
|                            | Prob > F = .0        | Prob > F = .0        | Prob > F = .0         | Prob > F = .0         |
|                            | R <sup>2</sup> = .13 | R <sup>2</sup> = .32 | R <sup>2</sup> = .55  | R <sup>2</sup> = .56  |

\* < .05; \*\* < .01; \*\*\* < .001 (one tailed tests)

- Time fixed effects are not reported

- Standard error in parentheses

Table 3B:  
Density for Lax Lockdown

| Variables                  | Model 3B.1           | Model 3B.2           | Model 3B.3            | Model 3B.4             |
|----------------------------|----------------------|----------------------|-----------------------|------------------------|
| Compliance at t-21         | -                    | -                    | -156.25 **<br>(49.39) | -164.67 ***<br>(50.14) |
| Density                    | .0002<br>(.0003)     | .0005<br>(.0005)     | .0007<br>(.0007)      | .0004<br>(.0007)       |
| Arab                       | -13.23<br>(5.28)     | -19.26<br>(7.22)     | -21.77<br>(10.36)     | -25.38<br>(10.6)       |
| Mixed                      | -1.18<br>(8.8)       | -1.24<br>(7.04)      | -6.1<br>(9.63)        | -7.82<br>(9.73)        |
| Bedouin                    | -.95<br>(11.52)      | 13.11<br>(13.01)     | -24.34<br>(27.13)     | -28.84<br>(27.39)      |
| Ultra-Orthodox             | 7.44<br>(19.96)      | -106.5 **<br>(37.24) | -156.72 **<br>(51.03) | -162.23 **<br>51.42    |
| Ultra-Orthodox<br>*Density | .002 ***<br>(.0007)  | 0.006 ***<br>(.001)  | .009 ***<br>(.002)    | .009 ***<br>(.002)     |
| Socioeconomic<br>scale     | -4.08<br>(2.62)      | -6.07<br>(3.33)      | 8.8<br>(7.1)          | 8.53<br>(7.17)         |
| Constant                   | 17.1 ***<br>(5.2)    | 14.67 ***<br>(7.15)  | 193.32 ***<br>(52.83) | 206.94 ***<br>(53.86)  |
|                            | N = 1,351            | N = 623              | N = 304               | N = 296                |
|                            | F (10, 1340) = 19.01 | F (10, 612) = 27.45  | F (11, 292) = 30.04   | F (11, 284) = 29.76    |
|                            | Prob > F = .0        | Prob > F = .0        | Prob > F = .0         | Prob > F = .0          |
|                            | R <sup>2</sup> = .12 | R <sup>2</sup> = .30 | R <sup>2</sup> = .53  | R <sup>2</sup> = .52   |

\* < .05; \*\* < .01; \*\*\* < .001 (one tailed tests)

- Time fixed effects are not reported

- Standard error in parentheses

Table 4B:  
Density for Stringent Lockdown

| Variables                  | Model 4B.1           | Model 4B.2           | Model 4B.3            | Model 4B.4             |
|----------------------------|----------------------|----------------------|-----------------------|------------------------|
| Compliance at t-21         | -                    | -                    | -157.89 **<br>(49.21) | -166.38<br>(49.95)     |
| Density                    | .0002<br>(.0003)     | .0004<br>(.0005)     | .0006<br>(.0007)      | .0003<br>(.0007)       |
| Arab                       | -12.96<br>(5.37)     | -18.92<br>(7.33)     | -21.34<br>(10.49)     | -25.2<br>(10.75)       |
| Mixed                      | -1.22<br>(8.8)       | -1.26<br>(7.04)      | -6.12<br>(9.59)       | -7.82<br>(9.69)        |
| Bedouin                    | -.60<br>(11.59)      | 13.49<br>(13.09)     | -23.63<br>(27.06)     | -28.42<br>(27.34)      |
| Ultra-Orthodox             | 8.41<br>(19.58)      | -106.8 **<br>(36.21) | -154.34 **<br>(49.53) | -160.18 ***<br>(49.92) |
| Ultra-Orthodox<br>*Density | .002 ***<br>(.0006)  | .004 ***<br>(.0009)  | .006 ***<br>(.001)    | .007 ***<br>(.001)     |
| Socioeconomic<br>scale     | -4.02<br>(2.63)      | -6.01<br>(3.32)      | 9.06<br>(7.08)        | 8.78<br>(7.15)         |
| Constant                   | 16.9 ***<br>(5.26)   | 14.6<br>(7.32)       | 195.26 ***<br>(52.72) | 209.2 ***<br>(53.76)   |
|                            | N = 1,351            | N = 623              | N = 304               | N = 296                |
|                            | F (10, 1340) = 19.10 | F (10, 612) = 27.77  | F (11, 292) = 30.45   | F (11, 284) = 30.18    |
|                            | Prob > F = .0        | Prob > F = .0        | Prob > F = .0         | Prob > F = .0          |
|                            | R <sup>2</sup> = .12 | R <sup>2</sup> = .31 | R <sup>2</sup> = .53  | R <sup>2</sup> = .54   |

\* < .05; \*\* < .01; \*\*\* < .001 (one tailed tests)

- Time dummies are not reported

- Standard error in parentheses

Table 5B:  
Average Household Density

| Variables                  | Model 5B.1           | Model 5B.2           | Model 5B.3           | Model 5B.4           |
|----------------------------|----------------------|----------------------|----------------------|----------------------|
| Compliance at t-21         | -                    | -                    | -128.4 *             | -139.68 **           |
|                            |                      |                      | (53.11)              | (53.95)              |
| Density                    | 3.93                 | 1.11                 | -.26                 | .27                  |
|                            | (2.68)               | (3.39)               | (6.1)                | (6.14)               |
| Arab                       | -16.79 ***           | .23.61 ***           | -31.29 **            | -35.42 **            |
|                            | (4.79)               | (7.09)               | (11.13)              | (11.37)              |
| Mixed                      | 1.11                 | -1.54                | -7.65                | -10.3                |
|                            | (7.46)               | (6.74)               | (10.08)              | (10.21)              |
| Bedouin                    | -24.37 *             | -23.51               | -37.25               | -44.89               |
|                            | (11.88)              | (16.36)              | (34.16)              | (34.53)              |
| Ultra-Orthodox             | 162.36 ***           | 422.46 ***           | 630.79 ***           | 629.85 ***           |
|                            | (33.81)              | (57.14)              | (86.15)              | (86.56)              |
| Ultra-Orthodox<br>*Density | -17.18 *             | -63.39 ***           | -90.4 ***            | -91.25 ***           |
|                            | (7.03)               | (10.91)              | (16.63)              | (16.72)              |
| Socioeconomic<br>scale     | -3.65                | -8.43                | .64                  | .07 **               |
|                            | (2.44)               | (3.39)               | (7.89)               | (7.96)               |
| Constant                   | 7.47                 | 17.69                | 175.6 **             | 188.13 ***           |
|                            | (9.57)               | (11.42)              | (57.05)              | (57.89)              |
|                            | N = 1,155            | N = 581              | N = 292              | N = 284              |
|                            | F (10 ,1144) = 26.88 | F (10, 570) = 30.40  | F (11, 280) = 26.90  | F (11, 272) = 26.80  |
|                            | Prob > F = .0        |
|                            | R <sup>2</sup> = .19 | R <sup>2</sup> = .34 | R <sup>2</sup> = .51 | R <sup>2</sup> = .52 |

\* < .05; \*\* < .01; \*\*\* < .001 (one tailed tests)

- Time fixed effects are not reported

- Standard error in parentheses

**Appendix C: all interactions included (only Ultra-Orthodox interaction is statistically significant)**

- Model 1C.1 specifies new cases per 100,000 in the last 14 days as the outcome variable and compliance at t-21 in for all cases.
- Model 1C.2 specifies new cases per 100,000 in the last 14 days as the outcome variable and compliance at t-21 only for cities with population over 20,000.

Table 1C:

All Contingent Effects

| Variables               | Model 1C.1                | Model 1C.2                |
|-------------------------|---------------------------|---------------------------|
| Compliance at t-21      | -154.09**<br>(48.5)       | -163.44***<br>(49.23)     |
| Density                 | -0.00008<br>(0.0007)      | -0.0003<br>(0.0007)       |
| Arab                    | -48.06<br>(38.59)         | -54.23<br>(38.93)         |
| Mixed                   | -26.37<br>(40.23)         | -32.3<br>(40.57)          |
| Bedouin                 | Omitted<br>(collinearity) | Omitted<br>(collinearity) |
| Ultra-Orthodox          | -166.23***<br>(26.59)     | -172.19***<br>(46.94)     |
| Arab *Density           | 0.002<br>(0.003)          | 0.002<br>(0.003)          |
| Mixed *Density          | 0.0004<br>(0.003)         | 0.0008<br>(0.003)         |
| Bedouin *Density        | -0.003<br>(0.002)         | -0.003<br>(0.002)         |
| Ultra-Orthodox *Density | 0.007***<br>(0.001)       | 0.007***<br>(0.001)       |
| Socioeconomic scale     | 9.82<br>(7.19)            | 9.61<br>(7.27)            |
| Population              | 0.00006*<br>(0.00003)     | 0.00006*<br>(0.00003)     |
| % over 60               | -0.85<br>(0.79)           | -0.84<br>(0.79)           |
| Constant                | 212.46***<br>(53.77)      | 227.39***<br>(54.84)      |
|                         | N = 304                   | N = 296                   |
|                         | F (15, 288) = 24.05       | F (15, 280) = 23.87       |
|                         | Prob > F = .0             | Prob > F = .0             |
|                         | R <sup>2</sup> = .56      | R <sup>2</sup> = .56      |

\* < .05; \*\* < .01; \*\*\* < .001 (one tailed tests)

- Time fixed effects are not reported

- Standard error in parentheses

## Appendix D: Regression models of COVID-19 infection rates and Compliance at t-28

Table 1D:  
Political Urban Attributes and Compliance at t-28

| Variables           | Model 1D.1            | Model 1D.2           |
|---------------------|-----------------------|----------------------|
| Compliance at t-28  | -150.06 **<br>(52.03) | -157.32**<br>(53.07) |
| Density             | .0003<br>(.0006)      | .0002<br>(.0006)     |
| Arab                | -10.93<br>(10.37)     | -13.67<br>(10.67)    |
| Mixed               | -3.07<br>(9.51)       | -4.24<br>(9.63)      |
| Bedouin             | -12.57<br>(26.67)     | -16.07<br>(27.02)    |
| Ultra-Orthodox      | -90.92 *<br>(45.64)   | -94.68*<br>(46.09)   |
| Ultra-Orthodox *    | .005 ***              | .005***              |
| Density             | (.001)                | (.001)               |
| Socioeconomic scale | 12.31<br>(7.93)       | 12.36<br>(8.03)      |
| Constant            | 198.84 **<br>(73.36)  | 211.86**<br>(75.17)  |
|                     | N = 304               | N = 296              |
|                     | F (11, 292) = 27.43   | F (11, 284) = 27.11  |
|                     | Prob > F = .0         | Prob > F = .0        |
|                     | R <sup>2</sup> = .51  | R <sup>2</sup> = .51 |

\* < .05; \*\* < .01; \*\*\* < .001 (one tailed tests)

- Time fixed effects are not reported

- Standard error in parentheses
